# Supplementary material
Source: PubMed Central journal article supplement (PMC6885622)
Supplement: supp_RA119.010827_155482_2_supp_413819_pzjq8c.pdf [file supp_RA119.010827_155482_2_supp_413819_pzjq8c.pdf]

A.

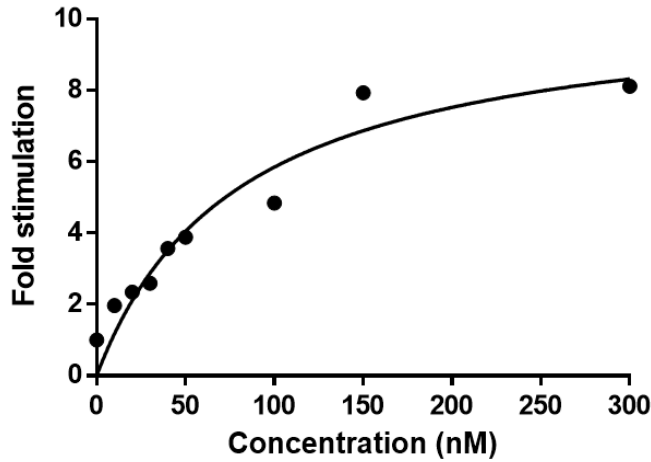

B.

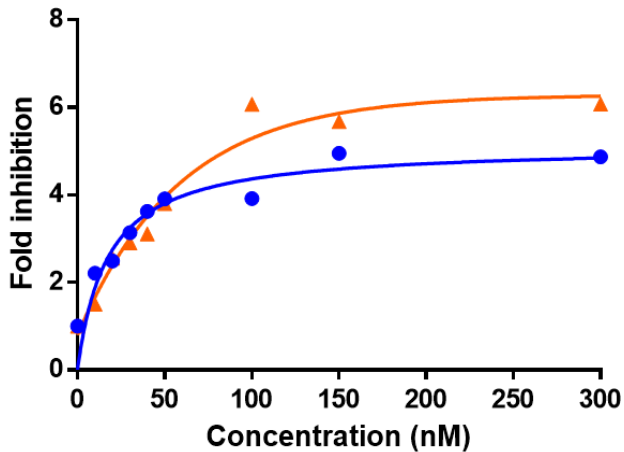

**Supplementary Figure 1. p53<sup>WT</sup> and p53<sup>R248W</sup> display stronger affinity for DNMT3A<sup>WT</sup> binding than DNMT3L.** Titration curves of 10 nM DNMT3A<sup>WT</sup> co-incubated for 1 hour at 37 °C with increasing concentrations of DNMT3L (A. ■), p53<sup>WT</sup> (B. ■) or p53<sup>R248W</sup> (C. ■) prior to the start of the reaction by the addition of DNA were used to determine apparent affinities ( $K_D^{app}$ ). Fold stimulation (A) was defined as the product formed by DNMT3A<sup>WT</sup> with DNMT3L divided by product formed by DNMT3A<sup>WT</sup> without DNMT3L. Fold inhibition (B and C) was determined by product formed by DNMT3A<sup>WT</sup> alone divided by product formed by DNMT3A<sup>WT</sup> with p53<sup>WT</sup> or p53<sup>R248W</sup>. Reactions were carried out at 37 °C for 1 hour following the addition of DNA (5  $\mu$ M bp poly dI-dC). Data reflect the results of 3 experiments.
