# Supplementary material
Source: PubMed Central journal article supplement (PMC6885622)
Supplement: supp_RA119.010827_155482_2_supp_413822_pzjq8c.pdf [file supp_RA119.010827_155482_2_supp_413822_pzjq8c.pdf]

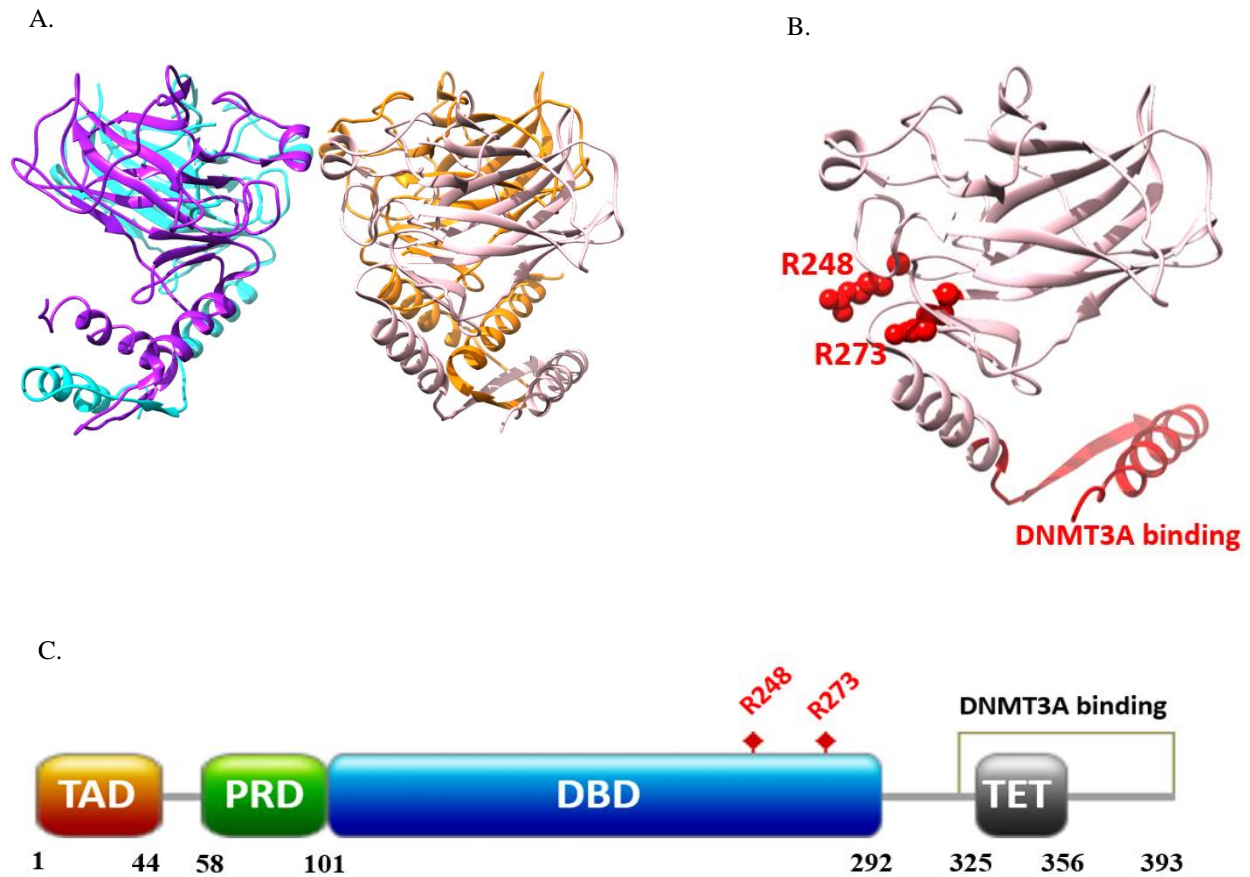

**Supplementary Figure 3. Depiction of p53<sup>WT</sup> mutations and region on p53<sup>WT</sup> for binding by DNMT3A.** (A.) p53<sup>WT</sup> homotetramer (adapted from PDB: 3TS8). (B.) p53<sup>WT</sup> monomer (adapted from PDB: 3TS8) displaying residues assessed in this study (R248 and R273) as well as the region on p53<sup>WT</sup> for DNMT3A binding (25). (C.) Domains in full-length p53<sup>WT</sup>: transactivation domain (TAD) (1-44), proline-rich domain (PRD) (58-101), DNA-binding domain (DBD) (102-292) and tetramerization domain (TET) (325-356) (80). DNMT3A has been shown to bind residues 319-393 (25).
